# Supplementary material for: Impact of a child stimulation intervention on early child development in rural Peru: a cluster randomised trial using a reciprocal control design
Source: PubMed Central journal article supplement — J Epidemiol Community Health. 2016 Sep 9;71(3):217–24. doi: 10.1136/jech-2015-206536 (PMC5318653; doi:10.1136/jech-2015-206536), 2016-09-09
Supplement: jech-2015-206536supp_figure1.pdf [file jech-2015-206536supp_figure1.pdf]

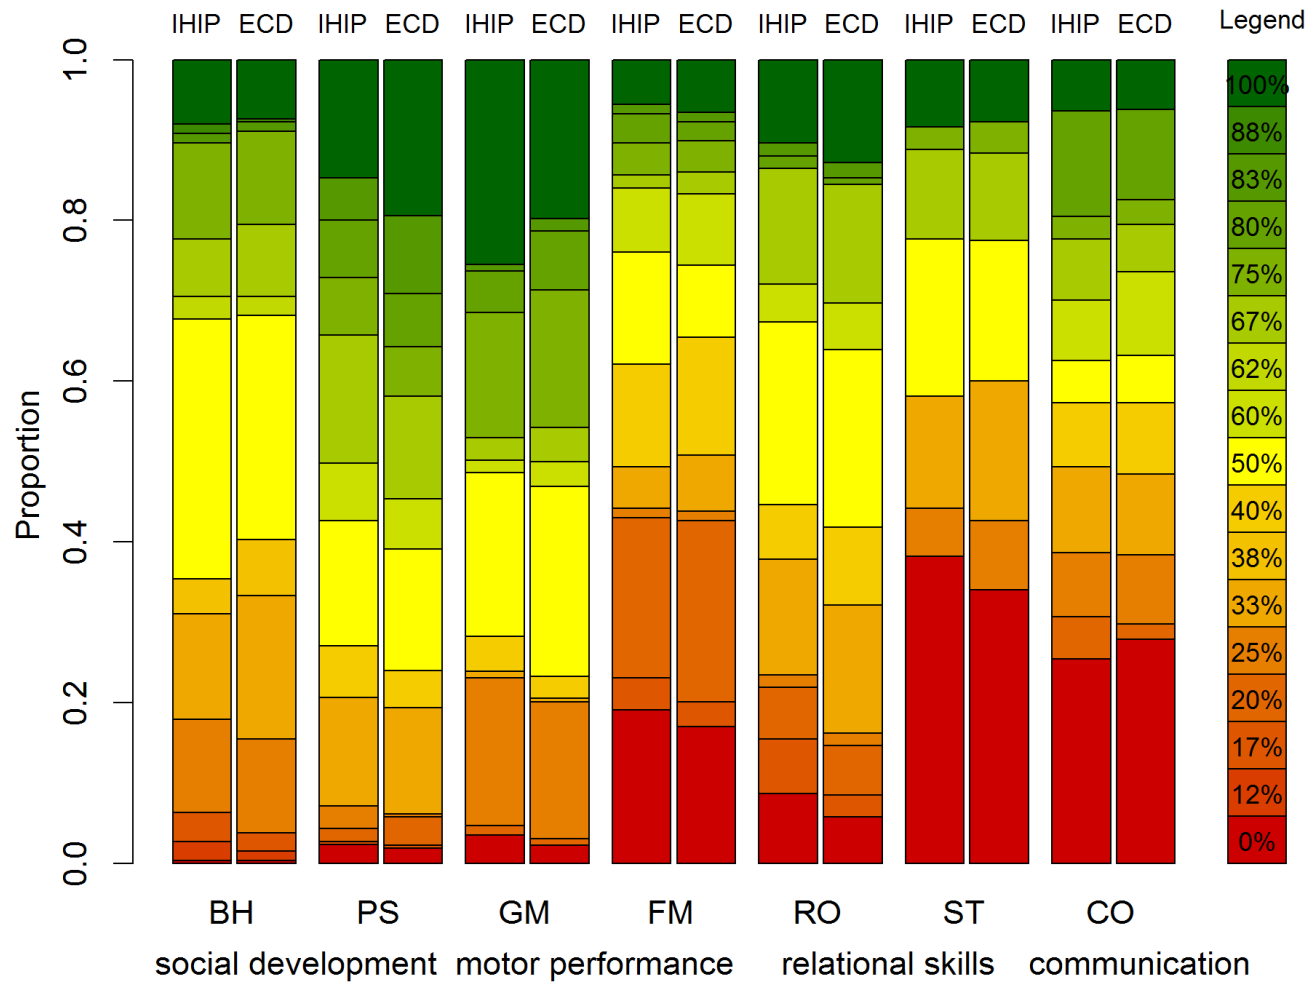

**Figure S1: Percentage of ECD assessment tasks solved at baseline by children in ECD- or IHIP-group separated by the seven development domains.**

The scale on the left indicates the proportion of children. The legend on the right indicates using colour-coding the percentage of tasks fulfilled by children in the ECD- or IHIP-group and separated by the seven development domains. BH: basic habits, PS: personal and social development, GM: gross motor skills, FM: fine motor skills, RO: relationship between objects, ST: space and time, CO: communication, ECD: early child development, IHIP: integrated home-based intervention package.
