# Supplementary material for: Impact of a child stimulation intervention on early child development in rural Peru: a cluster randomised trial using a reciprocal control design
Source: PubMed Central journal article supplement — J Epidemiol Community Health. 2016 Sep 9;71(3):217–24. doi: 10.1136/jech-2015-206536 (PMC5318653; doi:10.1136/jech-2015-206536), 2016-09-09
Supplement: jech-2015-206536supp_figure2.pdf [file jech-2015-206536supp_figure2.pdf]

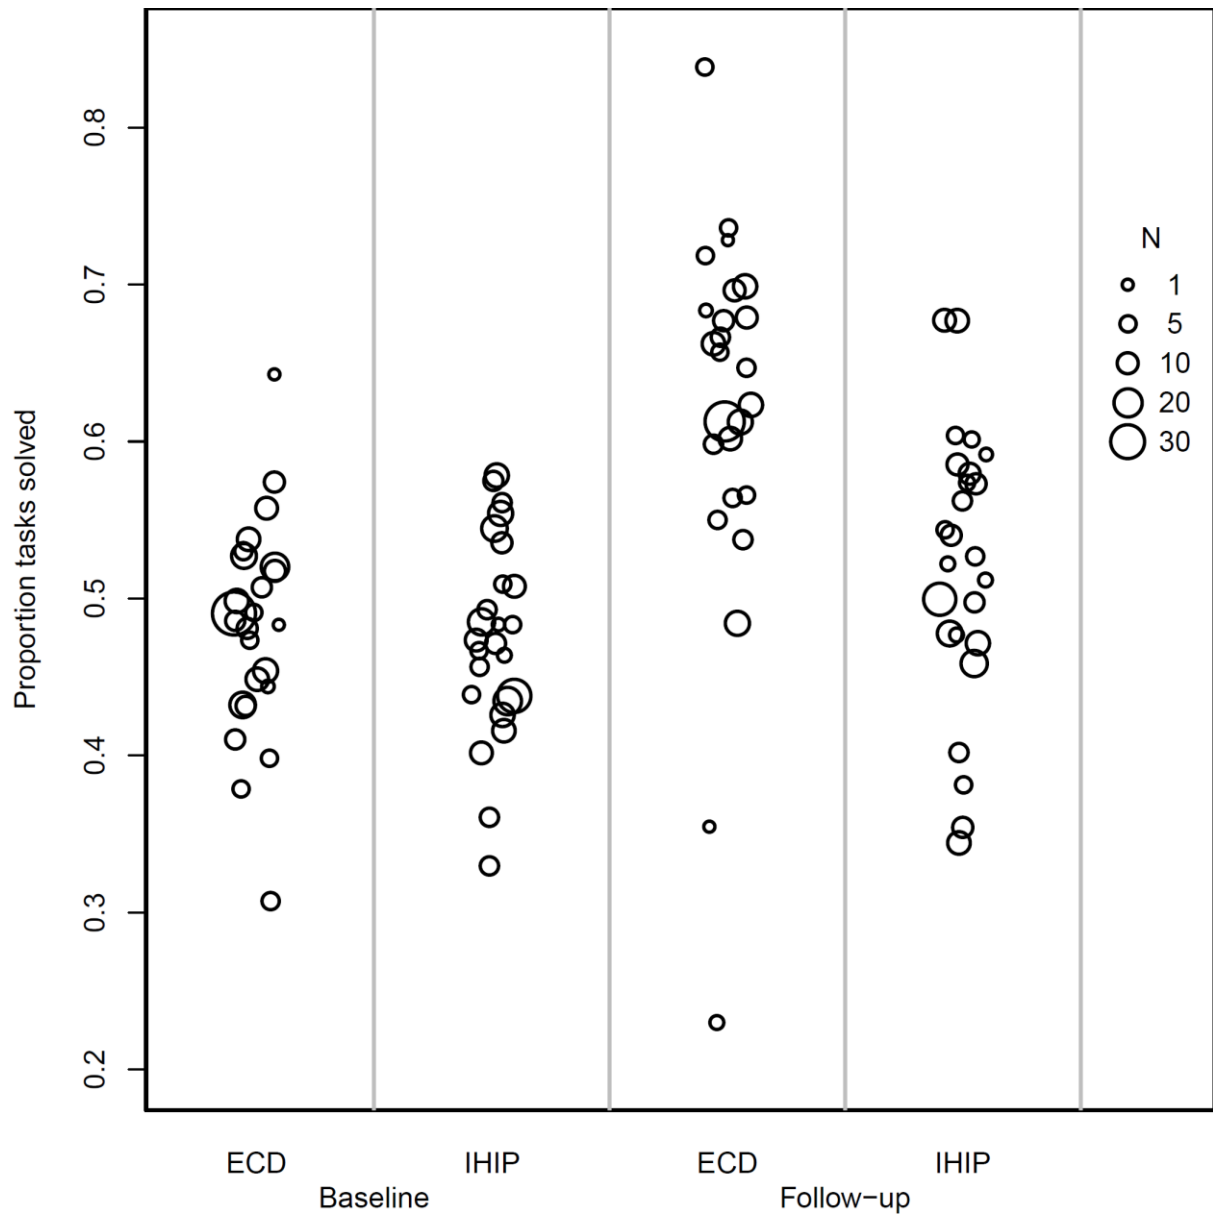

**Figure S2: Proportion of tasks solved on cluster level. The mean proportion of tasks solved aggregated over all sub-domains and age groups are presented. Circle size indicates the number of children with a certain village.**
