# Supplementary material for: Impact of a child stimulation intervention on early child development in rural Peru: a cluster randomised trial using a reciprocal control design
Source: PubMed Central journal article supplement — J Epidemiol Community Health. 2016 Sep 9;71(3):217–24. doi: 10.1136/jech-2015-206536 (PMC5318653; doi:10.1136/jech-2015-206536), 2016-09-09
Supplement: jech-2015-206536supp_table.pdf [file jech-2015-206536supp_table.pdf]

| Child-development indicator                            | IHIP-group  |             | ECD-group   |              |
|--------------------------------------------------------|-------------|-------------|-------------|--------------|
|                                                        | Followed    | Lost to FU  | Followed    | Lost to FU   |
| <b>N</b>                                               | 218         | 40          | 210         | 41           |
| Proportion solved of indicator [ <b>median (IQR)</b> ] |             |             |             |              |
| Basic Habits                                           | 50% (33-67) | 50% (33-64) | 50% (33-67) | 50% (33-50)  |
| Personal & Social Development                          | 67% (50-83) | 60% (47-80) | 60% (40-75) | 67% (50-100) |
| Gross Motor Skills                                     | 60% (50-80) | 75% (48-80) | 50% (40-83) | 75% (50-100) |
| Fine Motor Skills                                      | 40% (20-60) | 20% (13-40) | 37% (20-50) | 40% (20-50)  |
| Relationship between Objects                           | 50% (33-67) | 50% (33-60) | 50% (25-65) | 50% (40-67)  |
| Space & Time                                           | 33% (0-50)  | 33% (0-50)  | 33% (0-50)  | 50% (0-67)   |

**Table S1: Baseline performance stratified by loss to follow-up status**

Proportion of solved task by development indicator of children with follow up data and children without follow up data within each study group (IHIP and ECD).
